# Supplementary material for: The global view of mRNA-related ceRNA cross-talks across cardiovascular diseases
Source: PubMed Central journal article supplement (PMC5579186; doi:10.1038/s41598-017-10547-z), 2017-08-31
Supplement: 41598_2017_10547_MOESM1_ESM.pdf [file 41598_2017_10547_MOESM1_ESM.pdf]

## **The global view of mRNA related ceRNA cross-talks across cardiovascular diseases**

Chao Song<sup>1,†</sup>, Jian Zhang<sup>2,†</sup>, Hanping Qi<sup>1,†</sup>, Chenchen Feng<sup>2</sup>, Yunping Chen<sup>1</sup>, Yonggang Cao<sup>1</sup>,  
Lina Ba<sup>1</sup>, Bo Ai<sup>2</sup>, Qiuyu Wang<sup>2</sup>, Wei Huang<sup>1</sup>, Chunquan Li<sup>2,\*</sup>, Hongli Sun<sup>1,\*</sup>

<sup>1</sup> Department of Pharmacology, Harbin Medical University-Daqing, Daqing, 163319, China

<sup>2</sup> Department of Medical Informatics, Harbin Medical University-Daqing, Daqing, 163319, China.

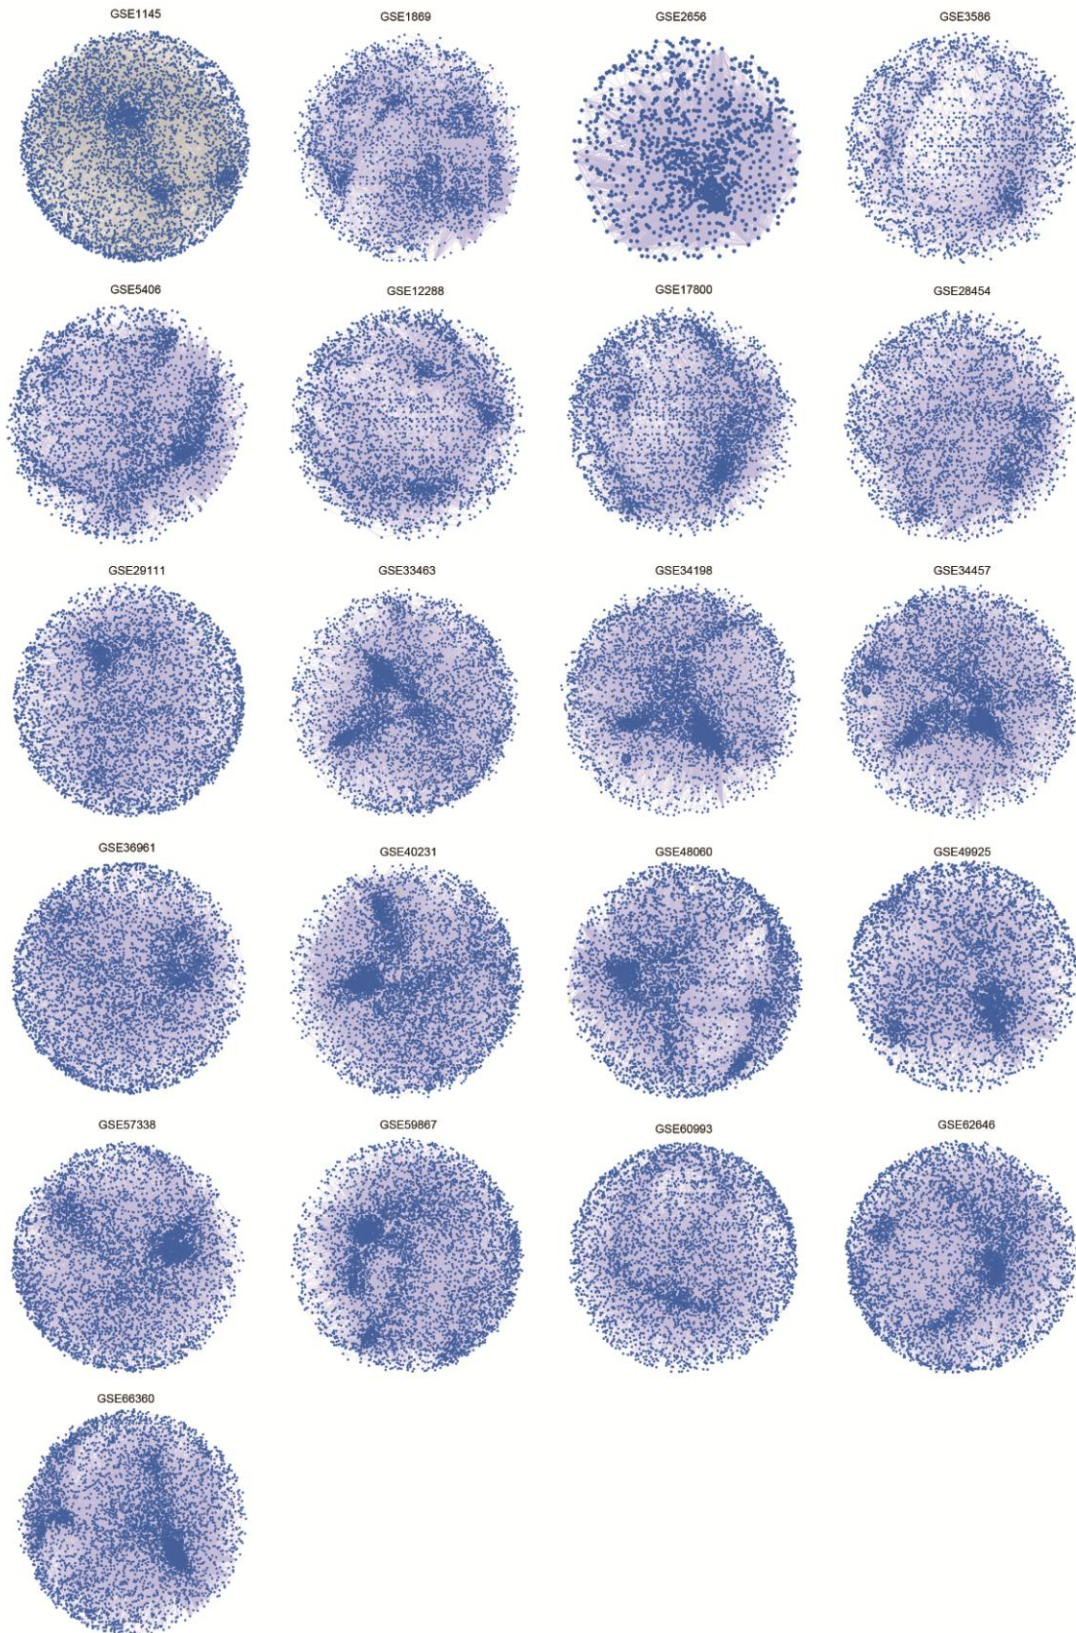

**Supplementary Figure S1: The view of ceRNA networks.** In our study, we performed 21 ceRNA networks from 8 CVDs and networks were visualized by Cytoscape.

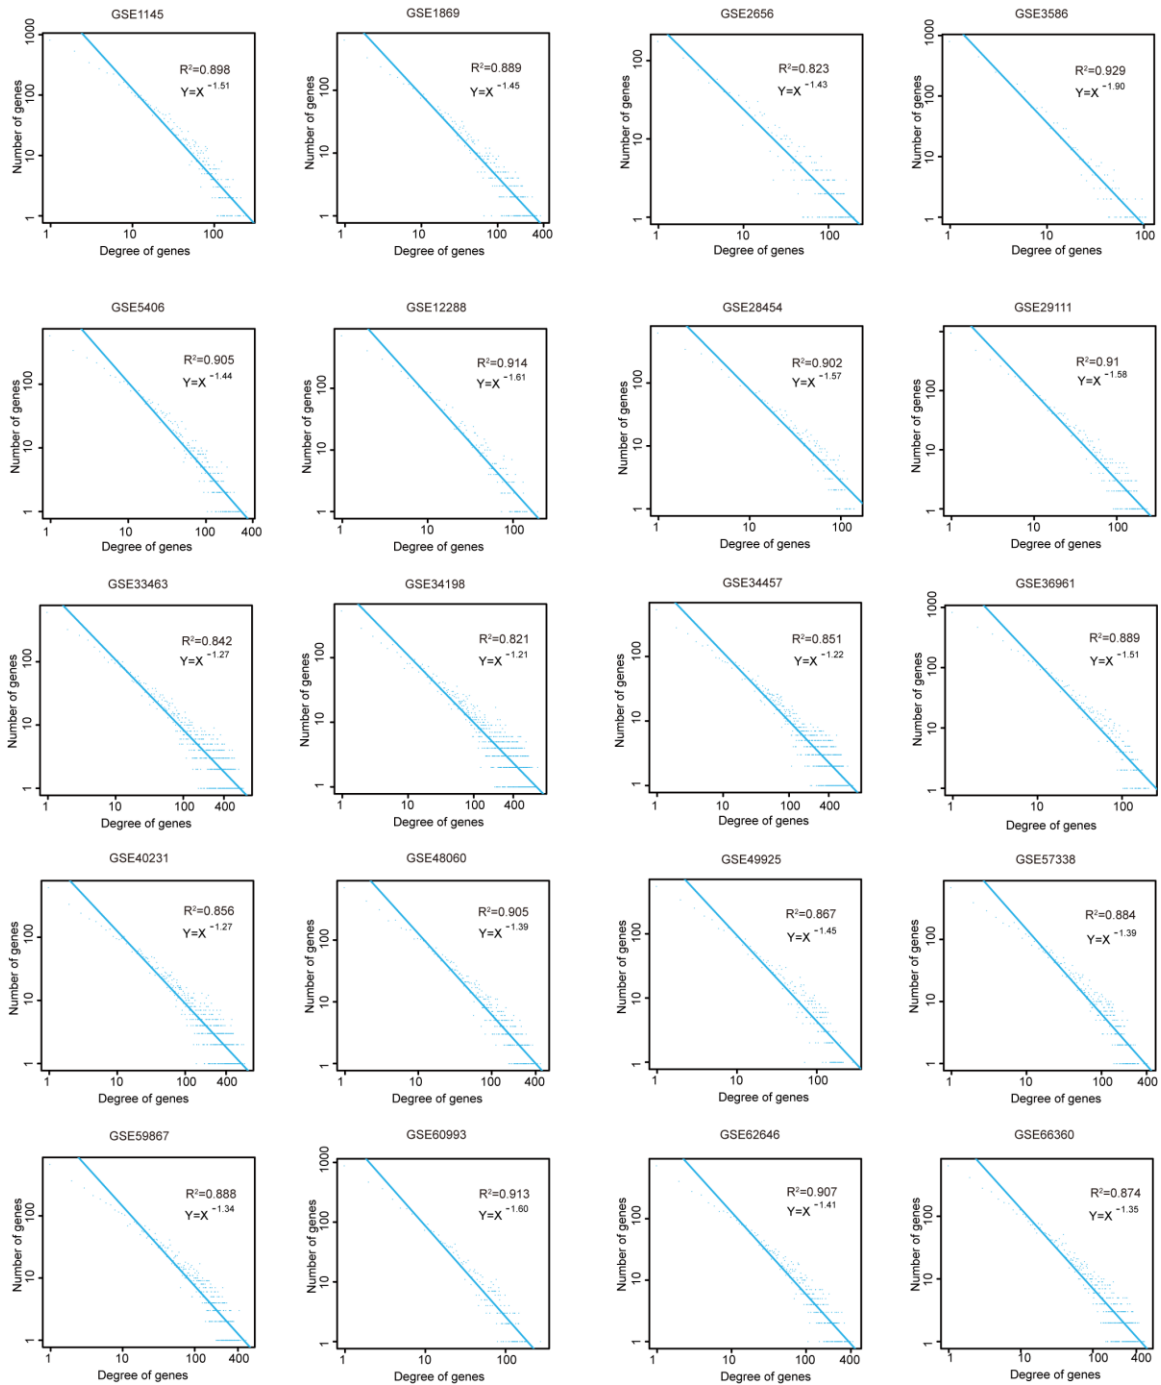

**Supplementary Figure S2: Degree distributions of ceRNA networks.** All these ceRNAs were followed power-law distributions, indicating that these ceRNA networks were scale-free.

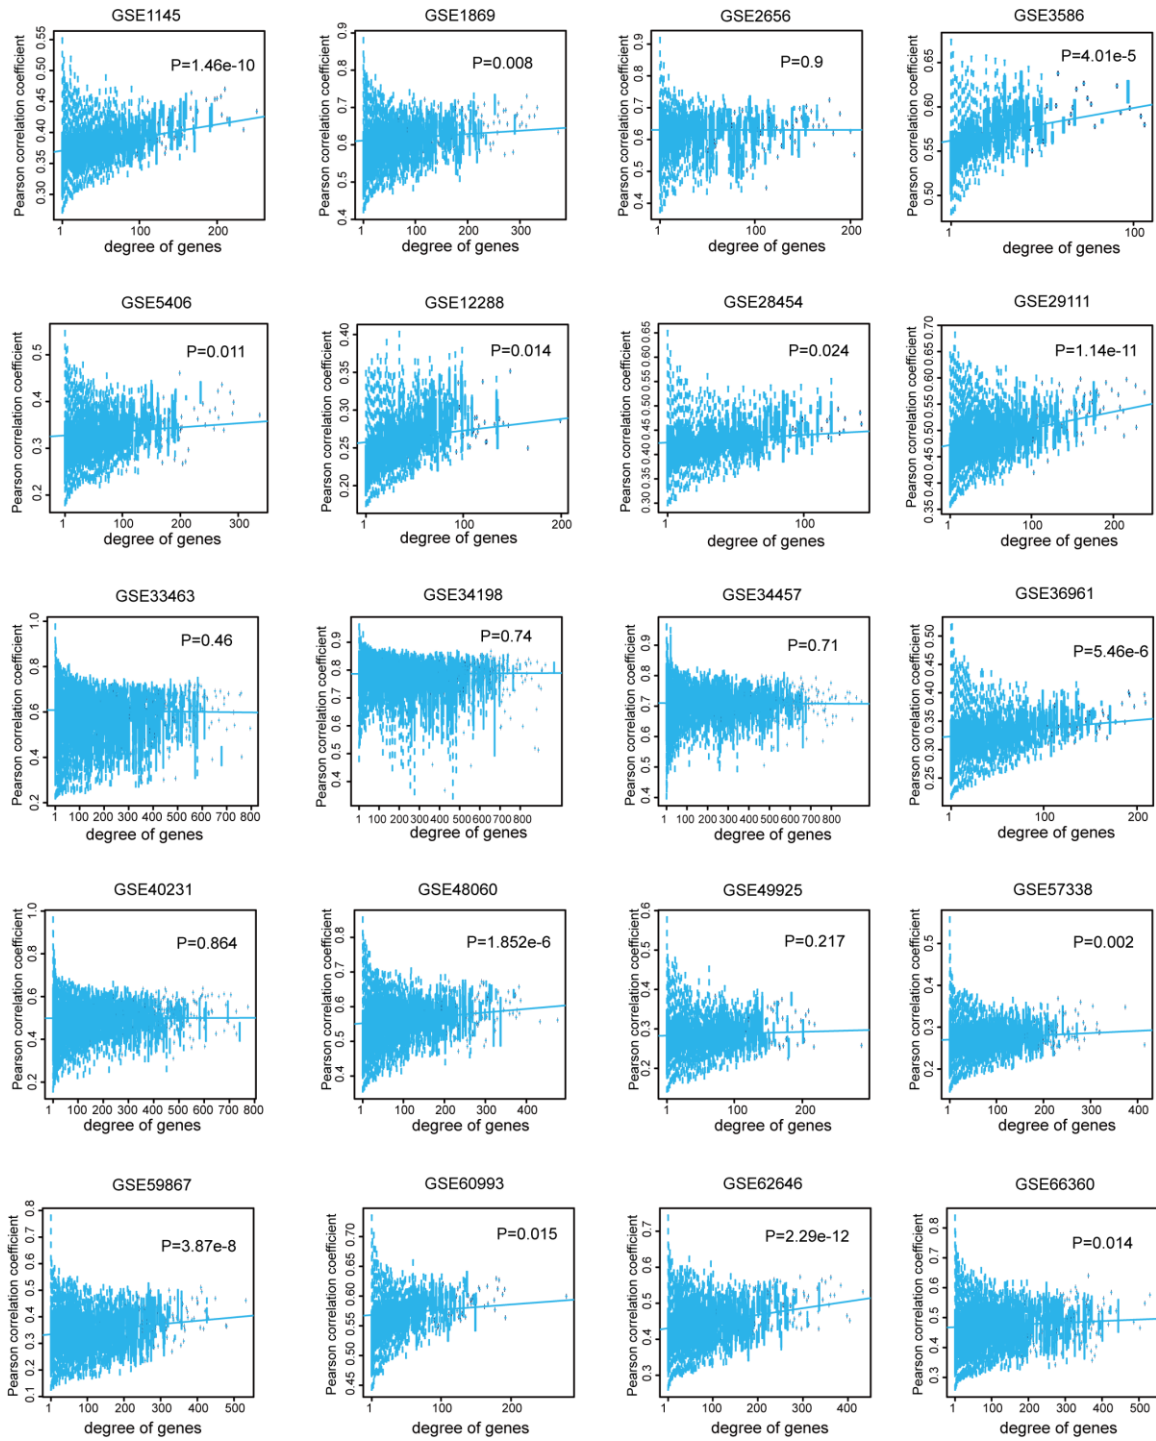

**Supplementary Figure S3: ceRNAs with high degree were strongly co-expressed than others.**

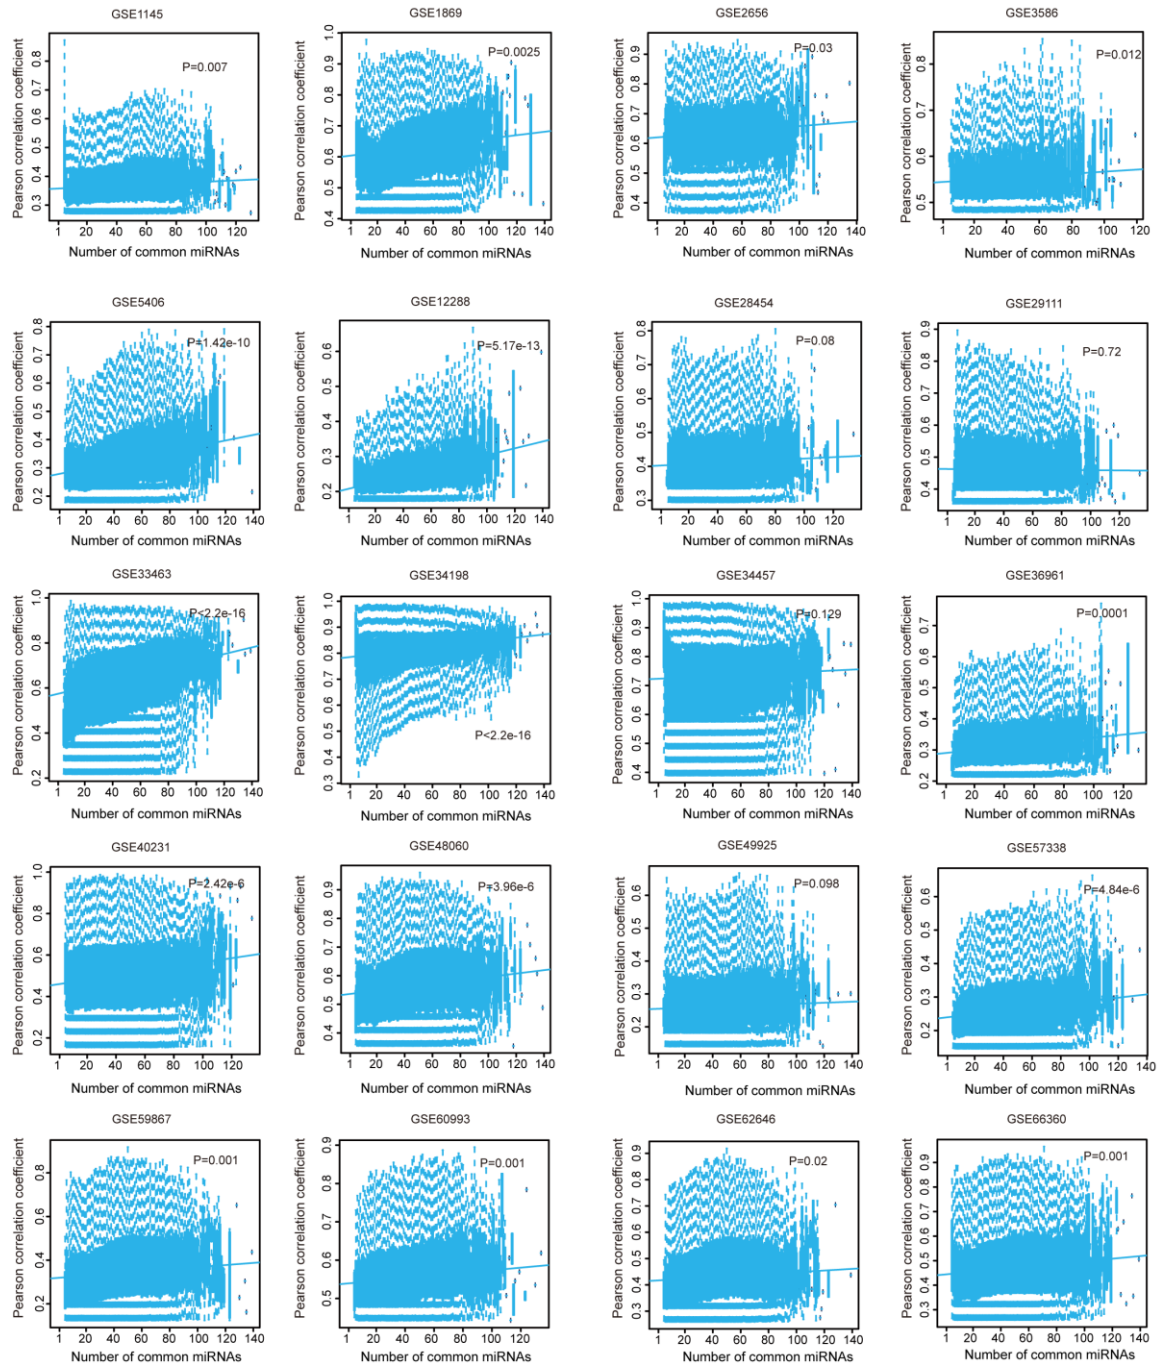

**Supplementary Figure S4: ceRNA pairs shared more miRNAs were strongly co-expressed than others.**

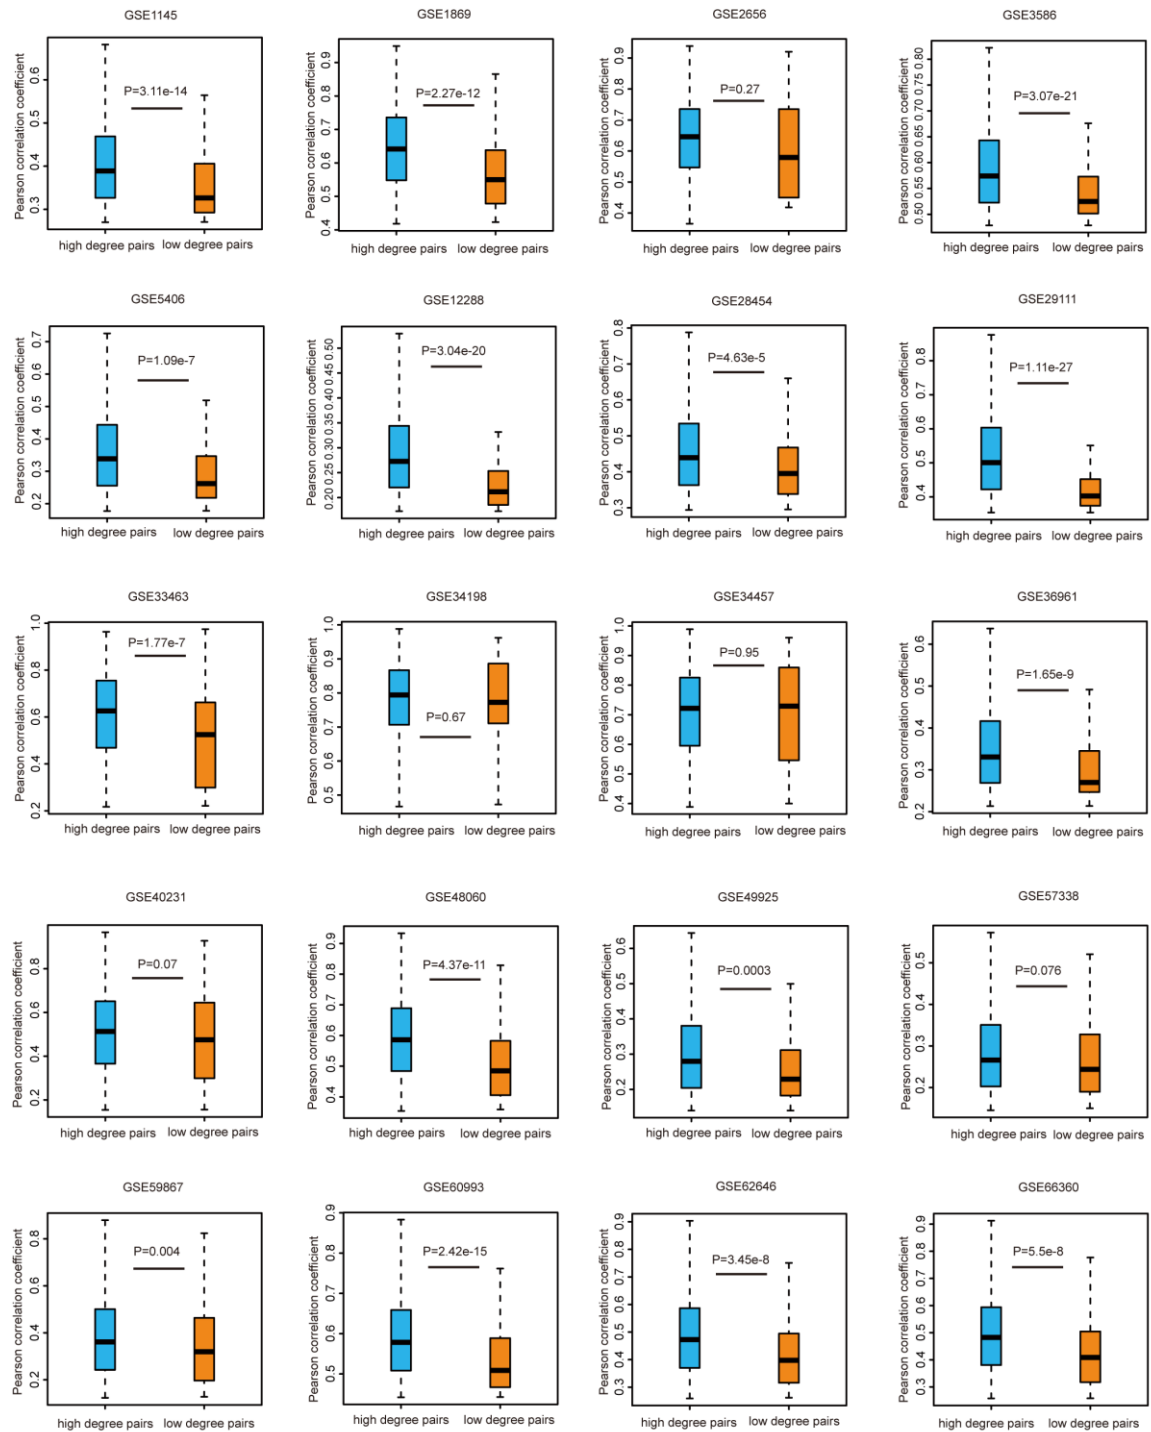

**Supplementary Figure S5: ceRNA pairs with high degree were strongly co-expressed than others.**

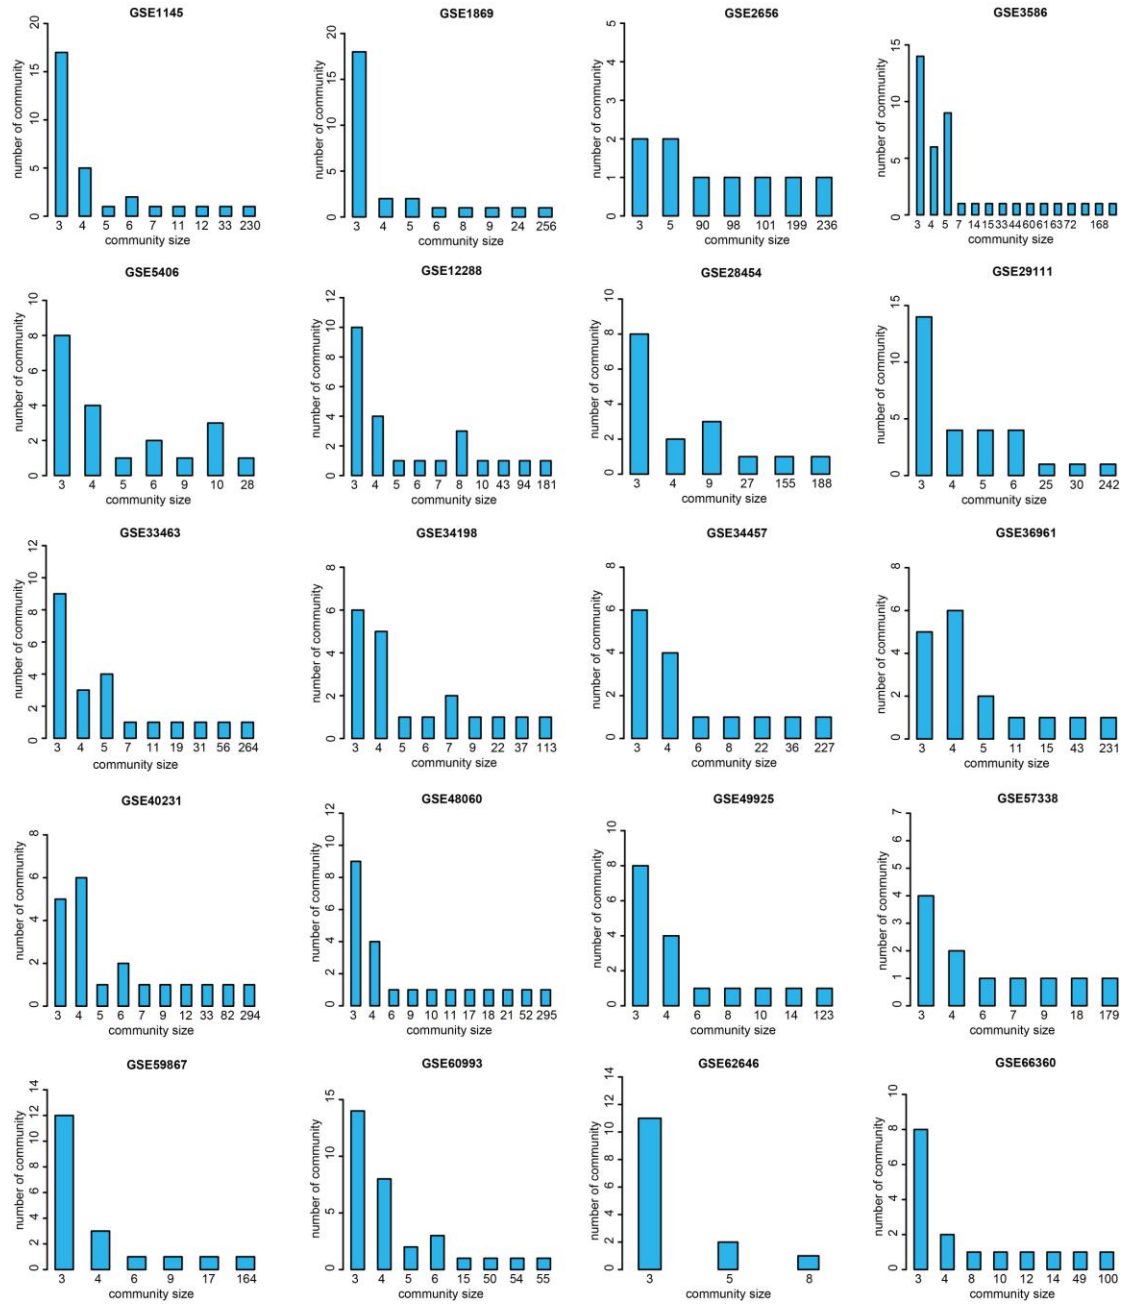

**Supplementary Figure S6: ceRNAs were likely to exert functions in small communities.**

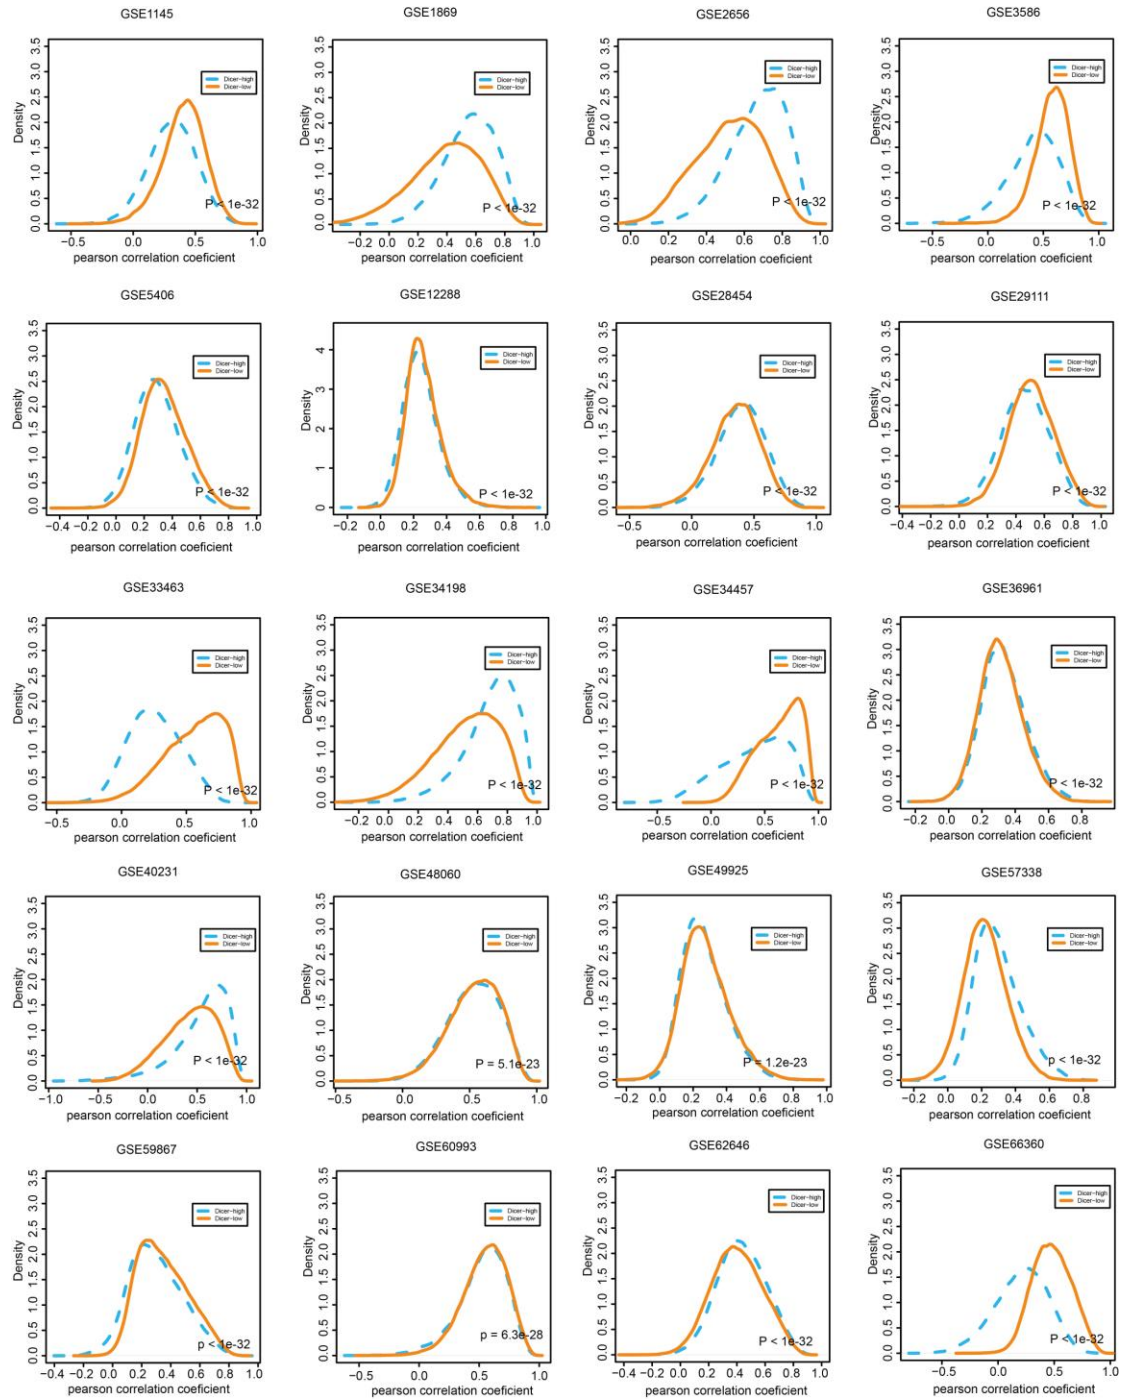

**Supplementary Figure S7: ceRNAs were likely to co-express in Dicer-low groups.**



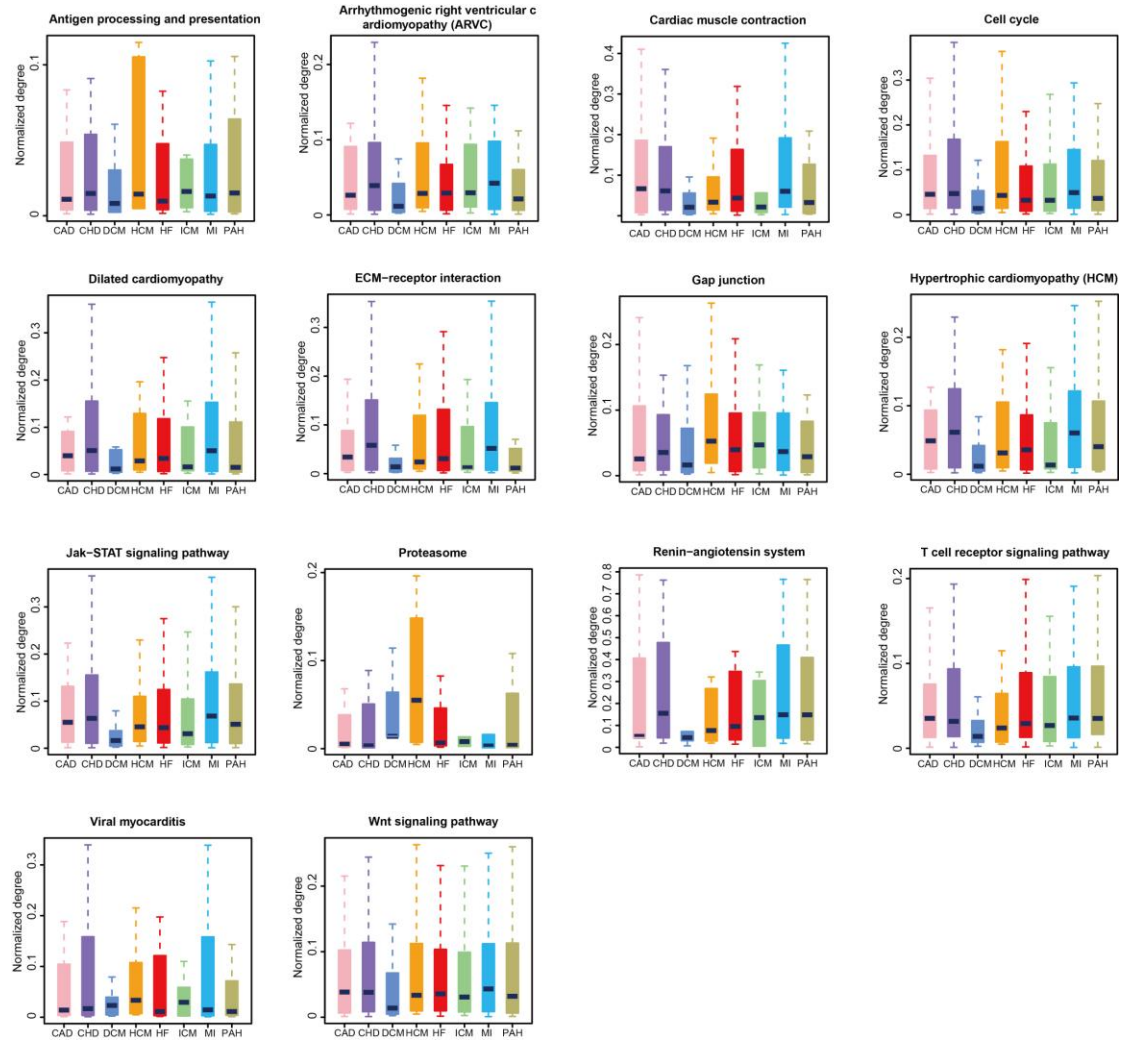

**Supplementary Figure S8: Normalized degree of ceRNAs mapped in each CVD related pathways.**

**Supplementary Table S1**

| GSE      | p-value     | FDR        | GSE      | p-value  | FDR      |
|----------|-------------|------------|----------|----------|----------|
| GSE1145  | 0.00999881  | 0.04279533 | GSE36961 | 0.01     | 0.041233 |
| GSE12288 | 0.00999893  | 0.05070619 | GSE40231 | 0.009998 | 0.012222 |
| GSE17800 | 0.009999983 | 0.06984682 | GSE48060 | 0.01     | 0.022985 |
| GSE1869  | 0.009998259 | 0.02478318 | GSE49925 | 0.01     | 0.019608 |
| GSE2656  | 0.009997529 | 0.01210045 | GSE5406  | 0.01     | 0.02285  |
| GSE28454 | 0.009999107 | 0.03521767 | GSE57338 | 0.009998 | 0.022185 |
| GSE29111 | 0.009999147 | 0.08085013 | GSE59867 | 0.009999 | 0.014418 |
| GSE33463 | 0.009997801 | 0.0136186  | GSE60993 | 0.009996 | 0.07749  |
| GSE34198 | 0.009990152 | 0.01001249 | GSE62646 | 0.01     | 0.023343 |
| GSE34457 | 0.009998558 | 0.01073682 | GSE66360 | 0.01     | 0.017437 |
| GSE3586  | 0.009998676 | 0.1658121  |          |          |          |

**Supplementary Table S2**

| Disease    | Disease name                | GSE number | Platform | Samples | Number of edges | Number of nodes |
|------------|-----------------------------|------------|----------|---------|-----------------|-----------------|
| <b>CAD</b> | Coronary artery disease     | GSE40231   | GPL570   | 278     | 236986          | 6120            |
|            |                             | GSE12288   | GPL96    | 222     | 25491           | 4053            |
| <b>HCM</b> | Hypertrophic cardiomyopathy | GSE36961   | GPL15389 | 145     | 50302           | 5432            |
| <b>HF</b>  | Heart failure               | GSE1145    | GPL570   | 90      | 52279           | 5681            |
|            |                             | GSE2656    | GPL2041  | 49      | 17940           | 1192            |
|            |                             | GSE5406    | GPL96    | 210     | 57256           | 4474            |
|            |                             | GSE57338   | GPL11532 | 313     | 95542           | 5675            |
| <b>DCM</b> | Dilated cardiomyopathy      | GSE3586    | GPL3050  | 28      | 8761            | 3061            |
|            |                             | GSE17800   | GPL570   | 48      | 40547           | 5061            |
| <b>MI</b>  | Myocardial infarction       | GSE48060   | GPL570   | 52      | 101896          | 5832            |
|            |                             | GSE60993   | GPL6884  | 33      | 32806           | 4892            |
|            |                             | GSE62646   | GPL6244  | 98      | 91534           | 5595            |
|            |                             | GSE66360   | GPL570   | 99      | 134936          | 5991            |
|            |                             | GSE28454   | GPL6883  | 76      | 27271           | 3780            |
|            |                             | GSE29111   | GPL570   | 52      | 40189           | 5173            |
|            |                             | GSE34198   | GPL6102  | 97      | 356446          | 6033            |
|            |                             | GSE59867   | GPL6244  | 436     | 136969          | 5755            |
| <b>PAH</b> | Pulmonary hypertension      | GSE49925   | GPL10558 | 338     | 52116           | 4115            |
|            |                             | GSE33463   | GPL6947  | 140     | 236397          | 6026            |
| <b>ICM</b> | Ischemic cardiomyopathy     | GSE1869    | GPL96    | 37      | 57922           | 4330            |
| <b>CHD</b> | Congenital Heart Disease    | GSE34457   | GPL6102  | 43      | 332679          | 6033            |

**Supplementary Table S3**

| pathwayId     | pathwayName                            | annMoleculeRatio | annBgRatio | pvalue   |
|---------------|----------------------------------------|------------------|------------|----------|
| path:04110_8  | Cell cycle                             | 5/688            | 28/21796   | 0.001661 |
| path:04920_4  | Adipocytokine signaling pathway        | 4/688            | 18/21796   | 0.002115 |
| path:04010_18 | MAPK signaling pathway                 | 5/688            | 30/21796   | 0.002286 |
| path:00600_2  | Sphingolipid metabolism                | 5/688            | 31/21796   | 0.002656 |
| path:04720_4  | Long-term potentiation                 | 7/688            | 60/21796   | 0.00274  |
| path:04060_54 | Cytokine-cytokine receptor interaction | 2/688            | 3/21796    | 0.002922 |
| path:04140_2  | Regulation of autophagy                | 2/688            | 3/21796    | 0.002922 |
| path:04920_7  | Adipocytokine signaling pathway        | 5/688            | 32/21796   | 0.003067 |
| path:04062_4  | Chemokine signaling pathway            | 5/688            | 33/21796   | 0.003522 |
| path:04010_12 | MAPK signaling pathway                 | 5/688            | 34/21796   | 0.004024 |
| path:04010_13 | MAPK signaling pathway                 | 5/688            | 34/21796   | 0.004024 |

|               |                                             |       |          |          |
|---------------|---------------------------------------------|-------|----------|----------|
| path:04920_3  | Adipocytokine signaling pathway             | 5/688 | 34/21796 | 0.004024 |
| path:04150_2  | mTOR signaling pathway                      | 5/688 | 35/21796 | 0.004575 |
| path:04141_21 | Protein processing in endoplasmic reticulum | 4/688 | 22/21796 | 0.004575 |
| path:04622_1  | RIG-I-like receptor signaling pathway       | 4/688 | 23/21796 | 0.005402 |
| path:04622_6  | RIG-I-like receptor signaling pathway       | 3/688 | 12/21796 | 0.005566 |
| path:00970_1  | Aminoacyl-tRNA biosynthesis                 | 2/688 | 4/21796  | 0.005722 |
| path:04010_1  | MAPK signaling pathway                      | 5/688 | 37/21796 | 0.005834 |
| path:04010_4  | MAPK signaling pathway                      | 5/688 | 38/21796 | 0.006547 |
| path:04720_5  | Long-term potentiation                      | 6/688 | 54/21796 | 0.006905 |
| path:04270_6  | Vascular smooth muscle contraction          | 3/688 | 13/21796 | 0.007068 |
| path:04620_5  | Toll-like receptor signaling pathway        | 3/688 | 13/21796 | 0.007068 |
| path:05145_12 | Toxoplasmosis                               | 3/688 | 13/21796 | 0.007068 |
| path:04350_6  | TGF-beta signaling pathway                  | 4/688 | 25/21796 | 0.007343 |
| path:04720_3  | Long-term potentiation                      | 6/688 | 56/21796 | 0.008234 |
| path:04350_1  | TGF-beta signaling pathway                  | 4/688 | 26/21796 | 0.008465 |
| path:04670_18 | Leukocyte transendothelial migration        | 4/688 | 26/21796 | 0.008465 |
| path:04670_20 | Leukocyte transendothelial migration        | 4/688 | 26/21796 | 0.008465 |
| path:04141_16 | Protein processing in endoplasmic reticulum | 3/688 | 14/21796 | 0.008787 |
| path:04141_23 | Protein processing in endoplasmic reticulum | 3/688 | 14/21796 | 0.008787 |
| path:05215_5  | Prostate cancer                             | 5/688 | 41/21796 | 0.009048 |
| path:05210_4  | Colorectal cancer                           | 2/688 | 5/21796  | 0.009338 |

**Supplementary Table S4**

| pathwayId     | pathwayName                             | annMoleculeRatio | annBgRatio | pvalue   |
|---------------|-----------------------------------------|------------------|------------|----------|
| path:04350_8  | TGF-beta signaling pathway              | 6/42             | 27/26232   | 3.35E-12 |
| path:04110_16 | Cell cycle                              | 6/42             | 47/26232   | 1.19E-10 |
| path:04350_1  | TGF-beta signaling pathway              | 5/42             | 25/26232   | 4.27E-10 |
| path:04110_11 | Cell cycle                              | 5/42             | 46/26232   | 1.07E-08 |
| path:04110_15 | Cell cycle                              | 5/42             | 47/26232   | 1.20E-08 |
| path:04110_12 | Cell cycle                              | 5/42             | 51/26232   | 1.83E-08 |
| path:04110_3  | Cell cycle                              | 5/42             | 55/26232   | 2.70E-08 |
| path:04350_6  | TGF-beta signaling pathway              | 4/42             | 25/26232   | 7.01E-08 |
| path:04010_3  | MAPK signaling pathway                  | 5/42             | 69/26232   | 8.57E-08 |
| path:04114_8  | Oocyte meiosis                          | 4/42             | 28/26232   | 1.13E-07 |
| path:04110_14 | Cell cycle                              | 4/42             | 30/26232   | 1.51E-07 |
| path:04722_5  | Neurotrophin signaling pathway          | 4/42             | 31/26232   | 1.73E-07 |
| path:04914_4  | Progesterone-mediated oocyte maturation | 3/42             | 10/26232   | 4.54E-07 |
| path:04722_4  | Neurotrophin signaling pathway          | 4/42             | 42/26232   | 6.08E-07 |
| path:04010_24 | MAPK signaling pathway                  | 4/42             | 47/26232   | 9.63E-07 |
| path:04144_9  | Endocytosis                             | 3/42             | 15/26232   | 1.71E-06 |
| path:04350_4  | TGF-beta signaling pathway              | 3/42             | 15/26232   | 1.71E-06 |

|               |                                             |      |          |          |
|---------------|---------------------------------------------|------|----------|----------|
| path:04722_8  | Neurotrophin signaling pathway              | 3/42 | 16/26232 | 2.11E-06 |
| path:04010_22 | MAPK signaling pathway                      | 4/42 | 63/26232 | 3.16E-06 |
| path:04010_23 | MAPK signaling pathway                      | 4/42 | 67/26232 | 4.04E-06 |
| path:04350_5  | TGF-beta signaling pathway                  | 3/42 | 21/26232 | 4.97E-06 |
| path:04350_7  | TGF-beta signaling pathway                  | 3/42 | 22/26232 | 5.75E-06 |
| path:00512_1  | Mucin type O-Glycan biosynthesis            | 3/42 | 26/26232 | 9.67E-06 |
| path:04144_2  | Endocytosis                                 | 3/42 | 37/26232 | 2.85E-05 |
| path:04110_1  | Cell cycle                                  | 3/42 | 40/26232 | 3.62E-05 |
| path:04010_11 | MAPK signaling pathway                      | 3/42 | 56/26232 | 9.97E-05 |
| path:04010_10 | MAPK signaling pathway                      | 3/42 | 57/26232 | 0.000105 |
| path:04914_2  | Progesterone-mediated oocyte maturation     | 2/42 | 10/26232 | 0.000112 |
| path:04720_2  | Long-term potentiation                      | 3/42 | 60/26232 | 0.000123 |
| path:04720_4  | Long-term potentiation                      | 3/42 | 60/26232 | 0.000123 |
| path:05134_9  | Legionellosis                               | 2/42 | 11/26232 | 0.000136 |
| path:04722_3  | Neurotrophin signaling pathway              | 3/42 | 69/26232 | 0.000186 |
| path:04914_7  | Progesterone-mediated oocyte maturation     | 2/42 | 13/26232 | 0.000193 |
| path:05145_11 | Toxoplasmosis                               | 2/42 | 13/26232 | 0.000193 |
| path:04114_1  | Oocyte meiosis                              | 2/42 | 14/26232 | 0.000225 |
| path:04114_2  | Oocyte meiosis                              | 2/42 | 14/26232 | 0.000225 |
| path:04141_16 | Protein processing in endoplasmic reticulum | 2/42 | 14/26232 | 0.000225 |
| path:04144_10 | Endocytosis                                 | 2/42 | 14/26232 | 0.000225 |
| path:04110_10 | Cell cycle                                  | 2/42 | 16/26232 | 0.000296 |
| path:04012_12 | ErbB signaling pathway                      | 2/42 | 17/26232 | 0.000335 |
| path:04064_4  | NF-kappa B signaling pathway                | 2/42 | 18/26232 | 0.000377 |
| path:04110_4  | Cell cycle                                  | 2/42 | 19/26232 | 0.000421 |
| path:05164_15 | Influenza A                                 | 2/42 | 19/26232 | 0.000421 |
| path:04914_6  | Progesterone-mediated oocyte maturation     | 2/42 | 21/26232 | 0.000515 |
| path:04010_17 | MAPK signaling pathway                      | 2/42 | 22/26232 | 0.000566 |
| path:04141_21 | Protein processing in endoplasmic reticulum | 2/42 | 22/26232 | 0.000566 |
| path:04010_19 | MAPK signaling pathway                      | 2/42 | 23/26232 | 0.00062  |
| path:04150_5  | mTOR signaling pathway                      | 2/42 | 23/26232 | 0.00062  |
| path:04150_3  | mTOR signaling pathway                      | 2/42 | 28/26232 | 0.000921 |
| path:04210_7  | Apoptosis                                   | 2/42 | 28/26232 | 0.000921 |
| path:04150_8  | mTOR signaling pathway                      | 2/42 | 30/26232 | 0.001058 |
| path:04012_3  | ErbB signaling pathway                      | 2/42 | 32/26232 | 0.001204 |
| path:04012_4  | ErbB signaling pathway                      | 2/42 | 32/26232 | 0.001204 |
| path:04010_20 | MAPK signaling pathway                      | 2/42 | 33/26232 | 0.00128  |
| path:04010_1  | MAPK signaling pathway                      | 2/42 | 37/26232 | 0.001609 |

|               |                                              |      |          |          |
|---------------|----------------------------------------------|------|----------|----------|
| path:04910_2  | Insulin signaling pathway                    | 2/42 | 39/26232 | 0.001786 |
| path:04713_11 | Circadian entrainment                        | 2/42 | 42/26232 | 0.002069 |
| path:04012_1  | ErbB signaling pathway                       | 2/42 | 43/26232 | 0.002168 |
| path:04010_9  | MAPK signaling pathway                       | 2/42 | 44/26232 | 0.002269 |
| path:04012_11 | ErbB signaling pathway                       | 2/42 | 45/26232 | 0.002372 |
| path:04012_7  | ErbB signaling pathway                       | 2/42 | 47/26232 | 0.002585 |
| path:04713_13 | Circadian entrainment                        | 2/42 | 47/26232 | 0.002585 |
| path:04713_14 | Circadian entrainment                        | 2/42 | 49/26232 | 0.002806 |
| path:04713_3  | Circadian entrainment                        | 2/42 | 50/26232 | 0.00292  |
| path:04672_12 | Intestinal immune network for IgA production | 1/42 | 2/26232  | 0.0032   |
| path:04380_3  | Osteoclast differentiation                   | 2/42 | 53/26232 | 0.003275 |
| path:04010_16 | MAPK signaling pathway                       | 2/42 | 54/26232 | 0.003397 |
| path:04713_9  | Circadian entrainment                        | 2/42 | 55/26232 | 0.003522 |
| path:04010_15 | MAPK signaling pathway                       | 2/42 | 59/26232 | 0.004041 |
| path:04010_2  | MAPK signaling pathway                       | 2/42 | 61/26232 | 0.004314 |
| path:04510_12 | Focal adhesion                               | 2/42 | 63/26232 | 0.004594 |
| path:04910_7  | Insulin signaling pathway                    | 2/42 | 64/26232 | 0.004738 |
| path:04150_4  | mTOR signaling pathway                       | 1/42 | 3/26232  | 0.004796 |
| path:04151_5  | PI3K-Akt signaling pathway                   | 2/42 | 71/26232 | 0.005799 |
| path:04010_14 | MAPK signaling pathway                       | 1/42 | 4/26232  | 0.006389 |
| path:04380_14 | Osteoclast differentiation                   | 1/42 | 4/26232  | 0.006389 |
| path:05142_7  | Chagas disease (American trypanosomiasis)    | 1/42 | 4/26232  | 0.006389 |
| path:05323_5  | Rheumatoid arthritis                         | 1/42 | 4/26232  | 0.006389 |
| path:04510_5  | Focal adhesion                               | 2/42 | 75/26232 | 0.006449 |
| path:04060_23 | Cytokine-cytokine receptor interaction       | 1/42 | 5/26232  | 0.007981 |
| path:04145_3  | Phagosome                                    | 1/42 | 5/26232  | 0.007981 |
| path:04612_6  | Antigen processing and presentation          | 1/42 | 5/26232  | 0.007981 |
| path:04726_4  | Serotonergic synapse                         | 1/42 | 5/26232  | 0.007981 |
| path:05210_4  | Colorectal cancer                            | 1/42 | 5/26232  | 0.007981 |
| path:05220_5  | Chronic myeloid leukemia                     | 1/42 | 5/26232  | 0.007981 |
| path:04320_6  | Dorso-ventral axis formation                 | 1/42 | 6/26232  | 0.009569 |
| path:04350_2  | TGF-beta signaling pathway                   | 1/42 | 6/26232  | 0.009569 |
| path:04350_3  | TGF-beta signaling pathway                   | 1/42 | 6/26232  | 0.009569 |
| path:05161_25 | Hepatitis B                                  | 1/42 | 6/26232  | 0.009569 |
| path:05169_5  | Epstein-Barr virus infection                 | 1/42 | 6/26232  | 0.009569 |

**Supplementary Table S5**

| pathwayId    | pathwayName                                 | annMoleculeRatio | annBgRatio | pvalue   |
|--------------|---------------------------------------------|------------------|------------|----------|
| path:04612_2 | Antigen processing and presentation         | 1/38             | 8/26232    | 0.011532 |
| path:04141_8 | Protein processing in endoplasmic reticulum | 1/38             | 12/26232   | 0.017249 |

|               |                                          |      |          |          |
|---------------|------------------------------------------|------|----------|----------|
| path:04722_8  | Neurotrophin signaling pathway           | 1/38 | 16/26232 | 0.022934 |
| path:04916_6  | Melanogenesis                            | 1/38 | 18/26232 | 0.025765 |
| path:04962_2  | Vasopressin-regulated water reabsorption | 1/38 | 20/26232 | 0.028587 |
| path:05215_4  | Prostate cancer                          | 1/38 | 21/26232 | 0.029995 |
| path:04722_5  | Neurotrophin signaling pathway           | 1/38 | 31/26232 | 0.043969 |
| path:04630_1  | Jak-STAT signaling pathway               | 1/38 | 38/26232 | 0.053634 |
| path:05215_5  | Prostate cancer                          | 1/38 | 41/26232 | 0.057747 |
| path:04010_9  | MAPK signaling pathway                   | 1/38 | 43/26232 | 0.060479 |
| path:04722_4  | Neurotrophin signaling pathway           | 1/38 | 43/26232 | 0.060479 |
| path:05215_10 | Prostate cancer                          | 1/38 | 44/26232 | 0.061843 |
| path:04010_11 | MAPK signaling pathway                   | 1/38 | 55/26232 | 0.076712 |
| path:04010_10 | MAPK signaling pathway                   | 1/38 | 56/26232 | 0.078052 |
| path:04010_22 | MAPK signaling pathway                   | 1/38 | 63/26232 | 0.087381 |
| path:04630_2  | Jak-STAT signaling pathway               | 1/38 | 87/26232 | 0.118674 |

**Supplementary Table legends:**

**Supplementary Table S1: Comparison and analysis of p-values and FDR that calculated from Pearson correlation coefficients.** We calculated p-values and corresponding FDR values for candidate ceRNA interactions in each gene expression profile. In each gene expression profile, we listed the maximum p-value and its adjusted FDR value in the table.

**Supplementary Table S2: The summary of data in this study.** In our study, we downloaded 21 gene expression profiles encompassed 8 CVDs. We listed the disease name, GSE number, platform, samples, number of edges and number of nodes in each network.

**Supplementary Table S3: Subpathway enrichment analysis of ceRNAs in common core ceRNA network.** In total, 32 subpathways were enriched by mapping the ceRNAs in common core ceRNA network into enrichment program.

**Supplementary Table S4: Subpathway enrichment analysis of common hub CDC40.** Some CVD related pathways were enriched, indicating that CDC40 and its interacted partners exerted similar functions in multi-CVDs.

**Supplementary Table S5: Subpathway enrichment analysis of differential hub BCL11A.** Different subpathways were enriched in different disease indicated that the potential different roles of BCL11A in CVDs.

**Supplementary Table S6: List of common ceRNA modules in our study.** In total, we identified 131 common modules in this study.
